# Supplementary material
Source: PubMed Central journal article supplement (PMC10132099)

## Supplementary Table 1

### Gene mutations identified in the efflux-deficient mutant, the LcS-s2 strain, compared with the LcS-wt strain

Presumed CF-efflux-associated genes, which were used for the gene complementation analysis, are highlighted with yellow.

| Variant ID | Amino acid change <sup>1</sup> | ORF ID (Gene symbol <sup>2</sup> ) | Estimated product <sup>2</sup>                    |
|------------|--------------------------------|------------------------------------|---------------------------------------------------|
| 1          | D488N                          | ORF0031                            | hypothetical protein                              |
| 2          | W547[FS]                       | ORF0390                            | hypothetical protein                              |
| 3          | G39D                           | ORF0762                            | hypothetical protein                              |
| 4          | E140K                          | ORF0942                            | UPF0210 protein                                   |
| 5          | A124V                          | ORF0980                            | phosphate-binding protein                         |
| 6          | D295N                          | ORF1083                            | ABC transporter substrate-binding protein         |
| 7          | G106D                          | ORF1085                            | sugar ABC transporter permease                    |
| 8          | T441I                          | ORF1247 ( <i>atpA</i> )            | ATP synthase subunit alpha                        |
| 9          | D172N                          | ORF1258                            | succinyl-diaminopimelate desuccinylase            |
| 10         | S162F                          | ORF1318                            | hypothetical protein                              |
| 11         | G254D                          | ORF1442 ( <i>pfkA</i> )            | ATP-dependent 6-phosphofructokinase               |
| 12         | G107D                          | ORF1744                            | 23S rRNA methyltransferase                        |
| 13         | G12E                           | ORF1924                            | NADP oxidoreductase                               |
| 14         | V142I                          | ORF2017                            | glutamine ABC transporter permease                |
| 15         | H394Y                          | ORF2155                            | threonine synthase                                |
| 16         | P729L                          | ORF2425                            | hypothetical protein                              |
| 17         | V59A                           | ORF2598                            | ABC transporter ATP-binding protein               |
| 18         | R29L                           | ORF2720                            | PTS N-acetylglucosamine transporter subunit IIABC |
| 19         | E206[FS]                       | ORF2864                            | signal transduction histidine kinase              |
| 20         | P38S                           | ORF2896                            | PTS mannitol transporter subunit IIA              |
| 21         | G127D                          | ORF2910                            | membrane protein                                  |

<sup>1</sup> FS indicates frame-shift mutation.

<sup>2</sup> Gene symbol and estimated product were assigned on the basis of a BLAST homology search ( $e < 0.00001$ , identity  $\geq 60\%$ , query coverage  $\geq 80\%$ ) using the DFAST default reference database v1.1.6 (DDBJ Fast Annotation and Submission Tool).

### Supplementary Figure 1

#### Comparison of FCM counts of CF-efflux-positive cells, those of membrane-integrity-positive cells, and CFU

LcS-FM samples stored at 4 °C for different periods were used for analysis. The FCM counts of CF-efflux-positive cells (L8+CF-PI-) and of membrane-integrity-positive cells (L8+Sytox-), as well as the numbers of colony forming units (CFUs), were compared. Day -14 means the day of production of LcS-FM and Day 0 means the best-before date of the product.

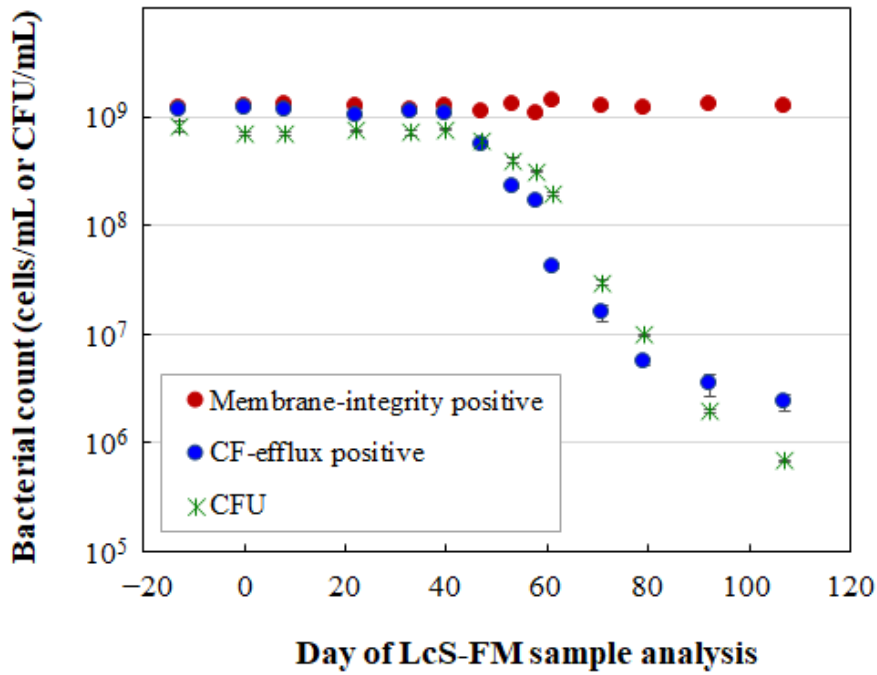

## Supplementary Figure 2

### CF-efflux activity in LAB strains

The CF-efflux activities of LAB strains were examined and the histograms of CF-fluorescence with (pink) and without (green) glucose were overlaid. When the median CF-fluorescence intensity with glucose was less than one-tenth of that without glucose, the strain was judged to be “efflux positive.”

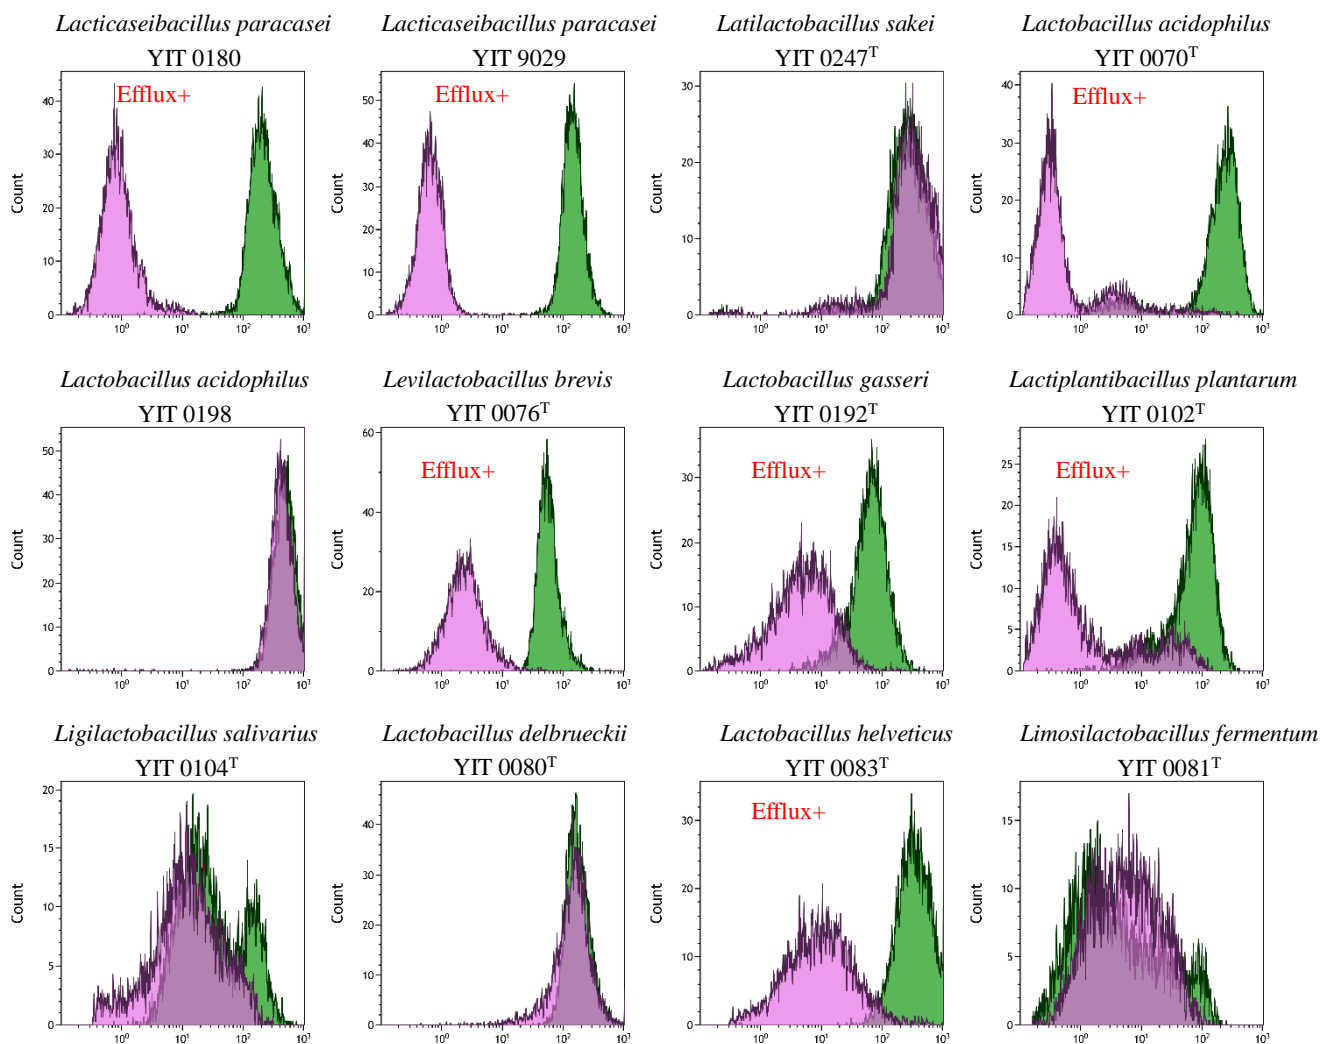

Supplement: aem.02156-22-s0001.pdf [file aem.02156-22-s0001.pdf]
